# Supplementary material for: 2020 – A year of changes, challenges and opportunities
Source: Oxford University Press journal article supplement (doi:10.1242/jeb.242155), 2021-01-01
Supplement: jeb242155supp.pdf [file jeb242155supp.pdf]

## **List of reviewers (1 January – 31 December 2020)**

Emily Abbott, Georgia Institute of Technology, USA

Hideki Abe, University of Tokyo, Japan

Thomas Abrams, University of Maryland, USA

Peter Adamczyk, University of Wisconsin-Madison, USA

Shelley Adamo, Dalhousie University, Canada

Coenraad Adema, University of New Mexico, USA

Peter Aerts, University of Antwerp, Belgium

Raise Ahmad, AgResearch Ltd, New Zealand

Anna Ahn, Harvey Mudd College, USA

Otar Akanyeti, Aberystwyth University, United Kingdom

Volkan Aksoy, Trakya University, Turkey

Joerg Albert, UCL School of Life and Medical Sciences, United Kingdom

Declan Ali, University of Alberta, Canada

Daiana Almeida De Souza, North Carolina State University, USA

Carlos Alonso-Alvarez, Museo Nacional de Ciencias Naturales, CSIC, Spain

Jordi Altimiras, Linköping University, Sweden

Douglas Altshuler, University of British Columbia, Canada

Mads Andersen, Carleton University, Canada

Erik Anderson, Woods Hole Oceanographic Institution, USA

Gary Anderson, University of Manitoba, Canada

Phillip Anderson, University of Illinois at Urbana-Champaign, USA

Rindy Anderson, Florida Atlantic University, USA

Denis Andrade, São Paulo State University (UNESP), Brazil

Fredrik Andreasson, Lund University, Sweden

Sumana Annagiri, Indian Institute of Science Education and Research (IISER), India

Katja Anttila, University of Turku, Finland

Jaywant Arakeri, Indian Institute of Science, India

Roberto Arbore, Instituto Gulbenkian de Ciência Oeiras, Portugal

Daniel Ardia, Franklin and Marshall College, USA

Andres Arenas, University of Buenos Aires, Argentina

Kentaro Arikawa, SOKENDAI, Japan

Shahaf Armon, Weizmann Institute of Science, Israel

Eric Armstrong, University of California, Berkeley, USA

Aristides Arrenberg, University of Tübingen, Germany

Nikolay Aseyev, Institute of Higher Nervous Activity and Neurophysiology, Russian Federation

Noah Ashley, Western Kentucky University, USA

Miriam Ashley-Ross, Wake Forest University, USA

James Ashton-Miller, University of Michigan, USA

Graham Askew, University of Leeds, United Kingdom

Henry Astley, University of Akron, USA

Nigel Atkinson, University of Texas, Austin, USA

Nadia Aubin-Horth, Laval University, Canada

Sonya Auer, Williams College, USA

Matthew Austin, University of Missouri - St Louis (UMSL), USA

Aurore Avargues-Weber, University Toulouse III - Paul Sabatier, France

David Awde, University of Kentucky, USA

Michael Axelsson, University of Gothenburg, Sweden

Manfred Ayasse, University of Ulm, Germany

Miriam Ayuso Hernando, University of Antwerp, Belgium

Manny Azizi, University of California, Irvine, USA

Davide Badano, University of Genoa, Italy

Christyn Bailey, Fish Immunology and Pathology Laboratory (CISA-INIA), Madrid, Spain

Emily Baird, Stockholm University, Sweden

George Bakken, Indiana State University, USA

Rohini Balakrishnan, Indian Institute of Science, India

G. S. Balamurali, Indian Institute of Science Education and Research, India

Karen Bales, University of California, Davis, USA

Bill Baltzopoulos, Liverpool John Moores University, United Kingdom

Meir Barak, Long Island University, USA

Eugene Baranov, Baikal Seal Aquarium, Russian Federation

Jesse Barber, Boise State University, USA

Espen Bariås, University of Bergen, Norway  
Brian Barnes, University of Alaska Fairbanks, USA  
Felipe Barreto, Oregon State University, USA  
Andrew Barron, Macquarie University, Australia  
Friedrich Barth, University of Vienna, Austria  
Ian Bartol, Old Dominion University, USA  
Norasmah Basari, Universiti Malaysia Terengganu, Malaysia  
Andrew Bass, Cornell University, USA  
Eleonora Bassino, University of Turin, Italy  
Christina Bauch, Groningen Institute for Evolutionary Life Sciences, Germany  
Carolyn Bauer, Adelphi University, USA  
Raymond Bauer, University of Louisiana at Lafayette, USA  
Otto Baumann, University of Potsdam, Germany  
Ryan Bavis, Bates College, USA  
Mark Bayley, University of Aarhus, Denmark  
Julian Beaman, Monash University, Australia  
Laura Beani, University of Florence, Italy  
Michael Beaulieu, German Oceanographic Museum, Germany  
Steven Beaupre, University of Arkansas, USA  
Claus Bech, Norwegian University of Science and Technology, Norway  
Michelle Beck, Rivier University, USA  
Owen Beck, Georgia Institute of Technology, USA  
Leandro Becker, IDEAUS (CENPAT-CONICET), Argentina  
Mark Bee, University of Minnesota, USA  
Kristian Beedholm, Aarhus University, Denmark  
Dimitris Beis, Academy of Athens, Greece  
Patricia Beldade, Instituto Gulbenkian de Ciência Oeiras, Portugal  
Thejasvi Beleyur, Max Planck Institute for Ornithology, Germany  
Miriam Belmaker, University of Tulsa, USA  
Barbara Beltz, Wellesley College, USA  
Gregor Belušič, University of Ljubljana, Slovenia

Jan Benda, University of Tübingen, Germany

Joshua Benoit, University of Cincinnati, USA

Thomas Benson, University of Illinois at Urbana-Champaign, USA

Blair Bentley, University of Massachusetts, Amherst, USA

Michael Berenbrink, Liverpool University, United Kingdom

Sadie Bergeron, West Virginia University, USA

Philip Bergmann, Clark University, USA

Abel Bernadou, University of Regensburg, Germany

Yara Bernaldo de Quiros, University of Las Palmas de Gran Canaria, Spain

Nicholas Bernier, University of Guelph, Canada

Martin Berón de Astrada, University of Buenos Aires, Argentina

Gabriel Bertolesi, Hotchkiss Brain Institute, Canada

Cristiano Bertolucci, University of Ferrara, Italy

John Bertram, University of Calgary, Canada

Olivier Bertrand, Bielefeld University, Germany

Aaron Best, Queen's University, Canada

Shivam Bhardwaj, Auburn University, USA

Meenakshi Bharti, Punjabi University, India

Isaac Bianco, University College London, United Kingdom

Jose Eduardo Bicudo, University of São Paulo, Brazil

Claudia Bieber, University of Veterinary Medicine Vienna, Austria

Peter Billingsley, Sanaria Inc., USA

Verner Bingman, Bowling Green State University, USA

Sandra Binning, University of Montreal, Canada

Pierre Paul Bitton, Memorial University of Newfoundland, Canada

Michelle Bland, The University of Virginia, USA

Horst Bleckmann, University of Bonn, Germany

Tamzin Blewett, University of Alberta, Canada

Reinhard Blickhan, Friedrich Schiller University Jena, Germany

Pierre Blier, University of Quebec, Canada

Richard Blob, Clemson University, USA

Simone Blomberg, University of Queensland, Australia

Gary Blomquist, University of Nevada, USA

Robert Bloodgood, University of Virginia Health System, USA

Dieter Blottner, Charité - Universitätsmedizin Berlin, Germany

Edward Blumenthal, Marquette University, USA

Leigh Boardman, University of Florida, USA

Christian Bock, Alfred Wegener Institute, Germany

Laurence Bodineau, Sorbonne University, France

Kirsten Bohn, Johns Hopkins, USA

Humberto Boncristiani, University of Florida, USA

Fran Bonier, Queen's University, Canada

Xavier Bonnet, Centre National de la Recherche Scientifique (CNRS), France

David Booth, The University of Queensland, Australia

Jan Boratyński, Polish Academy of Science, Poland

Feodor Borodich, Cardiff University, United Kingdom

Brittney Borowiec, Wilfrid Laurier University, Canada

Russell Borski, NC State University, USA

Vilmante Borutaite, Lithuanian University of Health Sciences, Lithuania

Youcef Bouchekioua, Hokkaido University Graduate School of Medicine, Japan

Andrew Bourke, University of East Anglia, United Kingdom

Ian Bouyoucos, ARC Centre of Excellence for Coral Reef Studies, Australia

Rachel Bowden, Illinois State University, USA

Timothy Bowden, University of Maine, USA

Sunny Boyd, University of Notre Dame, USA

Aaron Boyd, University of Alberta, Canada

Justin Boyles, Southern Illinois University, USA

Francisco Bozinovic, Universidad Catolica de Chile, Chile

Tim Bradley, University of California, Irvine, USA

Elizabeth Brainerd, Brown University, USA

Martin Brand, Buck Institute for Age Research, USA

Jacqueline Brashears, LaGuardia Community College, USA

Paul Brehm, Oregon Health and Science University, USA  
Ana Breit, University of Maine, USA  
Thomas Breithaupt, University of Hull, United Kingdom  
Kenny Breuer, Brown University, USA  
Peter Brice, The University of Queensland, Australia  
Diane Bridge, Elizabethtown College, USA  
Michael Briga, University of Turku, Finland  
Jen Bright, University of Hull, United Kingdom  
Signe Brinkloev, University of Western Ontario, Canada  
Francois Brischoux, Centre National de la Recherche Scientifique (CNRS), France  
Axel Brockmann, National Centre for Biological Sciences, TIFR, India  
Anne Bronikowski, Iowa State University, USA  
Grant Brown, Concordia University, Canada  
Jacob Brownscombe, Carleton University, Canada  
Henrik Brumm, Max Planck Institute for Ornithology, Germany  
Andres Brunetti, National University of Misiones, Argentina  
George Bruschi IV, Oklahoma State University, USA  
Matteo Bruzzone, University of Padua, Italy  
Daniel Buchholz, University of Cincinnati, USA  
Leslie Buck, University of Toronto, Canada  
Loren Buck, Northern Arizona University, USA  
Carol Bucking, York University, Canada  
Lauren Buckley, University of Washington, USA  
Kathrine Buckley, Auburn University, USA  
Rochelle Buffenstein, University of Texas Health Science Center, USA  
Jerome Buhl, University of Adelaide, Australia  
Belinda Bullard, University of York, United Kingdom  
Amanda Bundgaard, Aarhus University, Denmark  
Warren Burggren, University of North Texas, USA  
Tracy Burkhard, The University of Texas at Austin, USA  
Thomas Burkholder, Georgia Institute of Technology, USA

Sabrina Burmeister, University of North Carolina, USA  
Gary Burness, Trent University, Canada  
Karen Burnett, College of Charleston, USA  
Jennifer Burns, University of Alaska, USA  
Ronald Burton, University of California San Diego, USA  
Tim Burton, Norwegian University of Science & Technology, Norway  
Nic Bury, University of Suffolk, United Kingdom  
Stanislaw Bury, Jagiellonian University, Poland  
Peter Bushnell, Indiana University South Bend, USA  
Morten Busk, Aarhus University Hospital, Denmark  
Michael Butcher, Youngstown State University, USA  
Michael Butler, Lafayette College, USA  
Anja Buttstedt, Dresden University of Technology, Germany  
Tom Buurke, KU Leuven, Belgium  
Kelsey Byers, John Innes Centre, United Kingdom  
Maria Byrne, The University of Sydney, Australia  
Greg Byrnes, Siena College, USA  
Gerard Cabello, Différenciation Cellulaire et Croissance - UMR 866, France  
Chantal Cabello, Différenciation Cellulaire et Croissance - UMR 866, France  
Dave Cade, Stanford University, USA  
Fábio Cahuê, Federal University of Rio de Janeiro, Brazil  
Michael Caldwell, Gettysburg College, USA  
Marie-Claire Cammaerts, University of Brussels, Belgium  
Kevin Campbell, University of Manitoba, Canada  
Hamish Campbell, Charles Darwin University, Australia  
Florencia Camus, University College London, United Kingdom  
Fabian Canosa, IIB-INTECH, Argentina  
John Caprio, Louisiana State University, USA  
Teresa Carbonell, University of Barcelona, Spain  
Julie Carcaud, CNRS, France  
Vincent Careau, University of Ottawa, Canada

Karen Carleton, University of Maryland, College Park, USA  
Bruce Carlson, Washington University, USA  
David Carrier, University of Utah, USA  
Ralph Cartar, University of Calgary, Canada  
Stefania Casagrande, Max Planck Institute for Ornithology, Germany  
Jérôme Casas, Institut de Recherche sur la Biologie de l'Insecte (IRBI), France  
Giovanni Cavagna, University of Milan, Italy  
Eleanor Caves, Duke University, USA  
Javier Ceja-Navarro, Lawrence Berkeley National Laboratory, USA  
Sarah Certel, University of Montana, USA  
Priyadarshini Chakrabarti Basu, Oregon State University, USA  
Mark Chappell, University of California, Riverside, USA  
Guy Charmantier, University of Montpellier 2, France  
Jose Chaui-Berlinck, University of São Paulo, Brazil  
Jessica Chen, University of Hawaii at Manoa, USA  
Karen Cheney, The University of Queensland, Australia  
Bo Cheng, Pennsylvania State University, USA  
Karen Cheng, University of California, Los Angeles, USA  
Yienia Chiari, George Mason University, USA  
Anitha Chirumamilla, North Dakota State University, USA  
Jill Man Ying Chiu, Hong Kong Baptist University, China  
Steven Chown, Monash University, Australia  
Jozet-Alves Christelle, University of Caen Normandie, France  
Emil Christensen, University of Copenhagen, Denmark  
Jakob Christensen-Dalsgaard, University of Southern Denmark, Denmark  
Keith Christian, Charles Darwin University, Australia  
J. Sook Chung, University of Maryland Center for Environmental Science, USA  
Dillon Chung, National Institutes of Health, USA  
Adam Cieplinski, Kingston University, United Kingdom  
Adam Claridge-Chang, National University of Singapore, Singapore  
Melody Clark, British Antarctic Survey, United Kingdom



Christopher Clark, University of California, Riverside, USA  
Damon Clark, Yale University, USA  
Rebecca Clark, Texas A&M University, USA  
Andrew Clarke, British Antarctic Survey, United Kingdom  
Marcus Clauss, University of Zurich, Switzerland  
Fiona Clissold, The University of Sydney, Australia  
Conrad Cloutier, Laval University, Canada  
Susana Clusella-Trullas, Stellenbosch University, South Africa  
Helena Cochemé, Imperial College London, United Kingdom  
Sean Colin, Roger Williams University, USA  
Herve Colinet, Université de Rennes 1, France  
Jana Collatz, Agroscope, Switzerland  
Ross Collery, Medical College of Wisconsin Eye Institute, USA  
Tom Collett, University of Sussex, United Kingdom  
Matthew Collett, University of Exeter, United Kingdom  
Clint Collins, Sacramento State University, USA  
Stacey Combes, University of California, Davis, USA  
Barry Condron, University of Virginia, USA  
Martin Connaughton, Washington College, USA  
Heidy Contreras, University of La Verne, USA  
Peter Convey, British Antarctic Survey, United Kingdom  
Chelsea Cook, Arizona State University, USA  
Kerri Coon, University of Wisconsin-Madison, USA  
Christine Cooper, Curtin University, Australia  
Robin Cooper, University of Kentucky, USA  
Lisa Cooper, Northeast Ohio Medical University (NEOMED), USA  
Clara Cooper-Mullin, University of Rhode Island, USA  
David Coppola, Randolph Macon College, USA  
Román Corfas, California Institute of Technology, USA  
Jessica Cornils, University of Veterinary Medicine Vienna, Austria  
Fabio Cortesi, The University of Queensland, Australia

Andrew Cossins, University of Liverpool, United Kingdom

Jacky Cosson, University of South Bohemia in Ceske Budejovice, Czech Republic

Daniel Costa, University of California, Santa Cruz, USA

David Costantini, Muséum National d'Histoire Naturelle, France

Alessandra Costanzo, University of Milan, Italy

John Costello, Providence College, USA

Brian Counterman, Auburn University, USA

Noah Cowan, Johns Hopkins University, USA

Georgina Cox, University of Guelph, Canada

Robert Cox, University of Virginia, USA

Kristen Crandell, Bangor University, United Kingdom

Alison Cree, University of Otago, New Zealand

Bronwen Cribb, The University of Queensland, Australia

Roger Croll, Dalhousie University, Canada

Makaylee Crone, Pennsylvania State University, USA

Thomas Cronin, University of Maryland, USA

Adam Cronin, Tokyo Metropolitan University, Japan

Dane Crossley II, University of North Texas, USA

Jenna Crowe-Riddell, University of Michigan, USA

Darron Cullen, University of Cambridge, United Kingdom

Suzie Currie, Acadia University, Canada

Shannon Currie, Institute for Zoo and Wildlife Research, Germany

Nancy Curtin, Imperial College School of Medicine, United Kingdom

Tomer Czaczkes, University of Regensburg, Germany

Marcin Czarnoleski, Jagiellonian University, Poland

Rodrigo da Rosa, Federal University of Rio Grande do Sul (UFRGS), Brazil

Patricia da Silva Scardua, Universidade Federal da Paraíba, Brazil

Carolina da Silveira Scarpellini, Keenan Research Centre for Biomedical Science, Canada

Matthieu Dacher, Sorbonne University, France

Gheylen Daghfous, University of Montréal, Canada

Elizabeth Dahlhoff, Santa Clara University, USA

Monica Daley, University of California, Irvine, USA  
Anne Dalziel, Saint Mary's University, Canada  
Christian Damsgaard, University of British Columbia, Canada  
Peter Daniel, Hofstra University, USA  
Raymond Danner, University of North Carolina Wilmington, USA  
Nicole Danos, University of San Diego, USA  
Kristiaan D'Aout, University of Liverpool, United Kingdom  
Charles Darveau, University of Ottawa, Canada  
Yannicke Dauphin, Museum National d'Histoire Naturelle, France  
Ana Sofia David Fernandes, University of Sussex, United Kingdom  
Shireen Davies, University of Glasgow, United Kingdom  
Randall Davis, Texas A&M University, USA  
Hannah Davis, Carleton University, Canada  
Simon Davy, Victoria University of Wellington, New Zealand  
Gudrun De Boeck, University of Antwerp, Belgium  
Sietse de Boer, University of Groningen, Netherlands  
Maarten de Groot, Slovenian Forestry Institute, Slovenia  
David De Jong, University of São Paulo, Brazil  
Gustavo de Miranda, Smithsonian Institution, USA  
Mason Dean, Max Planck Institute, Germany  
Paul Dean, University of Sheffield, United Kingdom  
Stephen Deban, University of South Florida, USA  
Allan Degen, Ben-Gurion University of the Negev, Israel  
Hans Degens, Manchester Metropolitan University, United Kingdom  
Ari Dehn, Boston College, USA  
Kristen DeMoranville, University of Rhode Island, USA  
Dale DeNardo, Arizona State University, USA  
Mark Denny, Stanford University, USA  
Robert Denver, University of Michigan, USA  
Annette Denzinger, University of Tuebingen, Germany  
Charles Derby, Georgia State University, USA

Davina Derous, University of Aberdeen, United Kingdom  
Stacy DeRuiter, Calvin College, USA  
Maya deVries, UC San Diego, USA  
Pietro di Prampero, University of Udine, Italy  
Valentina Di Santo, Stockholm University, Sweden  
Candido Diaz, University of Akron, USA  
Francisco Diaz-Fleischer, Universidad Veracruzana, Mexico  
Taylor Dick, University of Queensland, Australia  
Morag Dick, University of Toronto, Canada  
Ralph DiLeone, Yale University, USA  
Michael Dillon, University of Wyoming, USA  
James Dimond, Western Washington University, USA  
Marc Dionne, Imperial College London, United Kingdom  
Petra Ditsche, University of Alaska Anchorage, USA  
Adam Dobson, University of Glasgow, United Kingdom  
Paolo Domenici, IAS-CNR Oristano, Italy  
Davide Dominoni, University of Glasgow, United Kingdom  
Nathaniel Dominy, Dartmouth College, USA  
Cassandra Donatelli, University of Ottawa, Canada  
Jennifer Donelson, James Cook University, Australia  
Yunwei Dong, Xiamen University, China  
Andrew Donini, York University, Canada  
Robert Dooling, University of Maryland, USA  
Angela Douglas, Cornell University, USA  
Ron Douglas, City, University of London, United Kingdom  
Natalia Dounskaia, Arizona State University, USA  
Julian Dow, University of Glasgow, United Kingdom  
W. Dowd, Washington State University, USA  
Nicolas Dowdy, Wake Forest University, USA  
Cynthia Downs, SUNY College of Environmental Science and Forestry, USA  
David Dreyer, Lund University, Sweden

William Driedzic, Memorial University of Newfoundland, Canada

Robert Dudley, University of California, Berkeley, USA

Kristin Duffield, USA Department of Agriculture, USA

Grant Duffy, Monash University, Australia

France Dufresne, UQAR, Canada

Donald Dunbar, San Diego State University, USA

Robin Dunkin, University of California, Santa Cruz, USA

Kent Dunlap, Trinity College, USA

Rebecca Dunlop, University of Queensland, Australia

Anne Duploux, Lund University, Sweden

Bruno Duran, São Paulo State University (UNESP), Brazil

Adrian Dyer, RMIT University, Australia

Yvonne Dzal, University of Winnipeg, Canada

Edward Dzialowski, University of North Texas, USA

Jeremy E. Niven, University of Sussex, United Kingdom

Daniel Eberl, University of Iowa, USA

Peter Edmunds, California State University, Northridge, USA

Owain Edwards, Centre for Environmental and Life Sciences, Australia

Stuart Egginton, University of Leeds, United Kingdom

Cas Eikenaar, Institute of Avian Research, Germany

Sigurd Einum, Norwegian University of Science and Technology (NTNU), Norway

Thomas Eiting, University of Utah, USA

Laura Ekstrom, Wheaton College, USA

Emily Elderbrock, North Dakota State University, USA

Damian Elias, University of California, Berkeley, USA

Chad Eliason, Field Museum of Natural History, USA

Yossef Elimelech, Technion Israel Institute of Technology, Israel

David Ellerby, Wellesley College, USA

Kyle Elliott, McGill University, Canada

Chris Elliott, University of York, United Kingdom

Michael Elnitsky, Mercyhurst University, USA

Christophe Eloy, Centrale Marseille, France

John Eme, California State University San Marcos, USA

Richard Emlet, Oregon Institute of Marine Biology, USA

Koilmani Emmanuvel Rajan, Bharathidasan University, India

Anders Enjin, Lund University, Sweden

Manfred Enstipp, Institut Pluridisciplinaire Hubert Curien (IPHC)/CNRS, France

Silvio Erlen, Julius Kuehn-Institut, Germany

Andrew Esbaugh, University of Texas at Austin, USA

Richard Essner, Southern Illinois University, USA

Sandeep Eswarappa, Indian Institute of Science, USA

Alistair Evans, Monash University, Australia

Randy Ewoldt, University of Illinois at Urbana-Champaign, USA

Sam Fabian, Imperial College London, United Kingdom

Angela Fago, Aarhus University, Denmark

Andreas Fahlman, Fundación Oceanogràfic de la Comunitat Valenciana, Spain

Philip Fahn-Lai, Harvard University, USA

Susan Fahrback, Wake Forest University, USA

Christopher Fang-Yen, University of Pennsylvania, USA

Walter Farina, Universidad de Buenos Aires, Argentina

C. G. Farmer, University of Utah, USA

Anthony Farrell, University of British Columbia, Canada

Hamilton Farris, Louisiana State University HSC, USA

Dominic Farris, University of Exeter, United Kingdom

Erin Faught, University of Calgary, Canada

Walter Federle, University of Cambridge, United Kingdom

Ken Fedorka, University of Central Florida, USA

Kathryn Feller, University of Minnesota, USA

Brock Fenton, University of Western Ontario, Canada

Laura Ferguson, Acadia University, Canada

Marcos Ferraz, Universidade do Estado do Rio de Janeiro, Brazil

Paola Ferrero, Centro de Investigaciones Cardiovasculares, Argentina

Guido Ferretti, University of Geneva, Switzerland  
Andre Fiala, University of Gottingen, Germany  
Wolfgang Fiedler, Max Planck Institute for Ornithology, Germany  
Renato Filogonio, Federal University of São Carlos, Brazil  
Michael Fine, Virginia Commonwealth University, USA  
James Finley, University of Southern California, USA  
Frank Fish, West Chester University, USA  
W. Tecumseh Fitch, University of Vienna, Austria  
Susan Fitzer, University of Stirling, United Kingdom  
Pauline Nikola Fleischmann, University of Würzburg, Germany  
Patricia Fleming, Murdoch University, Australia  
Monika Fleshner, College of Arts and Sciences, USA  
Jared Fletcher, Mount Royal University, Canada  
Marilyn Fogel, University of California, Riverside, USA  
Dina Fonseca, Rutgers University, USA  
Eric Fortune, New Jersey Institute of Technology, USA  
Kathleen Foster, Ball State University, USA  
James Foster, Lund University, Sweden  
Tarah Foster, University of Tulsa, USA  
Vincent Fourcassie, University of Toulouse (CNRS), France  
Melinda Fowler, Springfield College, USA  
Jessica Fox, Case Western Reserve University, USA  
Martino Franchi, University of Padua, Italy  
Craig Frank, Fordham University, USA  
Tamara Frank, Nova Southeastern University, USA  
Katrin Franke, Bernstein Center for Computational Neuroscience (BCCN), Germany  
Craig Franklin, The University of Queensland, Australia  
Amanda Franklin, University of Melbourne, USA  
Nigel Franks, University of Bristol, United Kingdom  
Cody Freas, University of Alberta, Australia  
Rikard Frederiksen, Jules Stein Eye Institute, UCLA, USA

Carolina Freire, Federal University of Paraná, Brazil  
Dalial Freitak, University of Graz, Austria  
Margaret French, University of Delaware, USA  
Christopher Friesen, University of Wollongong, Australia  
Sonja Friman, University of North Carolina, USA  
Marcus Fritze, University of Greifswald, Germany  
Bryan Fry, University of Queensland, Australia  
Douglas Fudge, Chapman University, USA  
Juan Fuentes, Centre of Marine Sciences, Portugal  
Lauren Fuess, University of Connecticut, USA  
Takafumi Fujimoto, Hokkaido University, Japan  
Andrea Fuller, University of the Witwatersrand, South Africa  
Matthew Fuxjager, Brown University, USA  
Molly Gabler-Smith, Harvard Museum of Comparative Zoology, USA  
Caitlin Gabor, Texas State University, USA  
Jürgen Gadau, University of Münster, Germany  
Gerd Gäde, University of Cape Town, South Africa  
Anna Gagliardo, University of Pisa, Italy  
James Gahan, University of Bergen, Norway  
Megan Gall, Vassar College, USA  
Gina Galli, University of Manchester, United Kingdom  
Anthony Gamperl, Memorial University of Newfoundland, Canada  
Eric Gangloff, Ohio Wesleyan University, USA  
Theodore Garland, University of California, Riverside, USA  
Julien Gasparini, iEES Paris, France  
Inga Geipel, Smithsonian Tropical Research Institute, Panama  
Fritz Geiser, University of New England, Australia  
Juergen Geist, TUM School of Life Sciences, Germany  
Brad Gemmell, University of South Florida, USA  
Lucie Gerber, Memorial University of Newfoundland, Canada  
Gabriele Gerlach, University of Oldenburg, Germany



Shannon Gerry, Fairfield University, USA  
Marc Gershow, New York University, USA  
Alexander Gerson, University of Massachusetts, Amherst, USA  
Cornelia Geßner, University of Hamburg, Germany  
Manuel Gesto, Danmarks Tekniske Universitet, Denmark  
Saroj Ghaskadbi, Savitribai Phule Pune University, India  
Allen Gibbs, University of Nevada, USA  
Josh Gibson, University of Illinois at Urbana-Champaign, USA  
Matthew Gifford, University of Central Arkansas, USA  
Erin Gillam, North Dakota State University, USA  
Christopher Gillen, Kenyon College, USA  
Gary Gillis, Mount Holyoke College, USA  
Todd Gillis, University of Guelph, Canada  
Bill Gilly, Stanford Hopkins Marine Station, USA  
Katie Gilmour, University of Ottawa, Canada  
William Gilpin, Harvard University, USA  
Tugrul Giray, University of Puerto Rico, USA  
Sylvain Giroud, University of Veterinary Medicine, Vienna, Austria  
Martin Giurfa, University Paul Sabatier, France  
Hillary Glandon, University of North Carolina Wilmington, USA  
Jordan Glass, Arizona State University, USA  
Xavier Glaudas, University of the Witwatersrand, South Africa  
Douglas Glazier, Juniata College, USA  
Adrian Gleiss, Murdoch University, Australia  
Martin Glösmann, University of Veterinary Medicine, Austria  
Chris Glover, Athabasca University, Canada  
Grace Goh, University of Western Australia, Australia  
Jeremy Goldbogen, Stanford University, USA  
Daniel Goldman, Georgia Institute of Technology, USA  
Igor Golic, University of Belgrade, Serbia  
Benjamin Goller, Purdue University, USA

David Goncalves, University of Saint Joseph, Macao

Richard Gonzalez, University of San Diego, USA

Paloma Gonzalez Bellido, University of Minnesota, USA

Michael Gordon, University of British Columbia, Canada

Lucy Gorman, Victoria University of Wellington, New Zealand

E. Axel Gorostiza, Regensburg University, Germany

Shin Goto, Osaka City University, Japan

Jinger Gottschall, Penn State University, USA

Joaquin Goyret, University of Tennessee at Martin, USA

Martyna Grabowska, Queensland Brain Institute, Australia

Paul Graham, University of Sussex, United Kingdom

Chloe Graham, University of Guelph, Canada

Michelle Graham, Virginia Tech, USA

Michael Granatosky, New York Institute of Technology, USA

Robyn Grant, Manchester Metropolitan University, United Kingdom

Nick Gravish, University of California, San Diego, USA

John Gray, University of Saskatchewan, Canada

Gabriele Greco, University of Trento, Italy

Kendra Greenlee, North Dakota State University, USA

Stefan Greif, Tel Aviv University, Israel

Tim Greives, North Dakota State University, USA

Jennifer Grindstaff, Oklahoma State University, USA

Matthew Grober, Georgia State University, USA

Wulfila Gronenberg, University of Arizona, USA

Derrick Groom, University of Washington, USA

Martin Grosell, RSMAS, University of Miami, USA

Christina Grozinger, Pennsylvania State University, USA

Helga Guderley, Laval University, Canada

Patrick Guerin, University of Neuchatel, Switzerland

Fernando Guerrieri, Université François Rabelais Tours (CNRS), France

Chris Guglielmo, University of Western Ontario, Canada

Roberto Guidetti, University of Modena and Reggio Emilia, Italy

Sarah Guindre-Parker, University of Guelph, Canada

Namrata Gundiah, Indian Institute of Science, India

Onur Güntürkün, Ruhr-Universität Bochum, Germany

Cristian Gutierrez-Ibanez, University of Alberta, Canada

Matthew Guzzo, University of Guelph, Canada

Hannah Haberkern, HHMI, Janelia Farm Research Campus, USA

Tom Hahn, University of California, Davis, USA

Daniel Hahn, University of Florida, USA

Jonas Håkansson, University of Southern Denmark, Sweden

Melina Hale, University of Chicago, USA

Petter Hall, Norwegian University of Science and Technology, Norway

Lewis Halsey, University of Roehampton, United Kingdom

Øyvind Halskau, University of Bergen, Norway

Scott Hamilton, Moss Landing Marine Laboratories, USA

Trevor Hamilton, MacEwan University, Canada

Kimberly Hammond, University of California, Riverside, USA

Steven Hand, Louisiana State University, USA

Wolf Hanke, University of Rostock, Germany

Frederike Hanke, University of Rostock, Germany

Jandy Hanna, West Virginia School of Osteopathic Medicine, USA

Kelly Hannan, James Cook University, Australia

Adam Hardy, University of Chicago, USA

James Harper, Sam Houston University, USA

Jon Harrison, Arizona State University, USA

Manfred Hartbauer, Karl-Franzens Universität Graz, Austria

Klaus Hartfelder, University of São Paulo, Brazil

Aaron Hartmann, Harvard University, USA

Adam Hartstone-Rose, North Carolina State University, USA

Ross Hatton, Oregon State University, USA

Mark Hauber, University of Illinois at Urbana-Champaign, USA

Alexander Haverkamp, Wageningen University, Netherlands  
Lucy Hawkes, University of Exeter, United Kingdom  
Dana Hawley, Virginia Tech, USA  
Hilary Hayford, University of Washington, USA  
Graeme Hays, Deakin University, Australia  
Timothy Healy, University of California, San Diego, USA  
Anders Hedenström, Lund University, Sweden  
Tyson Hedrick, University of North Carolina, USA  
Arne Hegemann, Lund University, Sweden  
Waldir Heinrichs, National Institute for Research of the Amazon, Brazil  
Stanley Heinze, Lund University, Sweden  
Kim Hellgren, University of California, Davis, USA  
Barbara Helm, University of Glasgow, United Kingdom  
Ruth Hemmersbach, German Aerospace Center, Germany  
Jan Hemmi, University of Western Australia, Australia  
Natalie Hempel de Ibarra, University of Exeter, United Kingdom  
Youn Henry, Université Rennes 1, France  
Jens Herberholz, University of Maryland, USA  
Neill Herbert, University of Auckland, New Zealand  
Jessica Hernandez, Virginia Tech, USA  
Anthony Herrel, Muséum National d'Histoire Naturelle, France  
Susan Herring, University of Washington, USA  
Emily Herstoff, Stony Brook University, USA  
Anthony Hessel, University of Münster, Germany  
Dominik Heyers, University of Oldenburg, Germany  
Anthony Hickey, The University of Auckland, New Zealand  
Dennis Higgs, University of Windsor, Canada  
Timothy Higham, University of California, Riverside, USA  
Geoffrey Hill, Auburn University, USA  
Bradford Hill, University of Louisville, USA  
Neil Hillier, Acadia University, Canada

Julián Hillyer, Vanderbilt University, USA  
Scott Hinch, University of British Columbia, Canada  
Kenneth Hinchcliff, University of Melbourne, Australia  
Allyson Hindle, University of Nevada, Las Vegas, USA  
Robert Hinrichsen, Indiana University of Pennsylvania, USA  
Shigehise Hirose, Tokyo Institute of Technology, Japan  
Binyamin Hochner, Hebrew University, Israel  
Sandra Hochscheid, Stazione Zoologica Anton Dohrn, Italy  
Kathleen Hoffman, University of Maryland, USA  
Esa Hohtola, University of Oulu, Finland  
Kim Hoke, Colorado State University, USA  
Casey Holliday, University of Missouri, USA  
Nicholas Holowka, Harvard University, USA  
Thomas Holstein, Heidelberg University, Germany  
Natalie Holt, University of California, Riverside, USA  
Uwe Homberg, Philipps University of Marburg, Germany  
Wendy Hood, Auburn University, USA  
Pavel Horký, Czech University of Life Sciences Prague, Czech Republic  
Collin Horn, University of Alberta, Canada  
Angela Horner, California State University San Bernardino, USA  
Erzsébet Hornung, University of Veterinary Medicine Budapest, Hungary  
Brendan Houston, Monash University, Australia  
Martin How, University of Bristol, United Kingdom  
Ronald Hoy, Cornell University, USA  
Jennifer Hoy, University of Nevada, Reno, USA  
Alan Hreljac, California State University, USA  
S. Tonia Hsieh, Temple University, USA  
David Hu, Georgia Institute of Technology, USA  
Marian Hu, Christian-Albrechts-Universität zu Kiel, Germany  
Peter Hubbard, Centro de Ciências do Mar, Portugal  
Robert Huber, Bowling Green State University, USA

Dezene Huber, University of Northern British Columbia, Canada  
Christine Huffard, Monterey Bay Aquarium Research Institute, USA  
Nicholas Huffeldt, Greenland Institute of National Resources, Denmark  
Ariana Huffmyer, University of Hawaii at Manoa, USA  
Simon Hughes, Kings College London, United Kingdom  
Riley Hughes, University of Illinois at Urbana-Champaign, USA  
Darrin Hulseley, University of Konstanz, Germany  
Ian Hume, University of Sydney, Australia  
Antoine Humeau, Institut de Recherche sur la Biologie de l'Insecte, France  
Rosalind Humphreys, University of St Andrews, United Kingdom  
Arild Husby, Uppsala Universitet, Sweden  
Pung-Pung Hwang, Academia Sinica, Taiwan  
Susumu Hyodo, University of Tokyo, Japan  
Igor Iatsenko, Max Planck Institute for Infection Biology, Germany  
Marko Ilić, Sokendai Institute of Advanced Studies, Japan  
Vladimir Ilic, University of Belgrade, Serbia  
Björn Illing, James Cook University, Australia  
Katherine Indeck, University of Queensland, Australia  
Jose Iriarte-Diaz, Sewanee: The University of the South, USA  
Duncan Irschick, University of Massachusetts Amhurst, USA  
Tom Irving, Illinois Institute of Technology, USA  
Atsushi Ishimatsu, Nagasaki University, Japan  
Etsuro Ito, Waseda University, Japan  
William Ja, The Scripps Research Institute, USA  
Robert Jackson, University of Canterbury, New Zealand  
Rob James, Coventry University, United Kingdom  
Vincent Janik, University of St Andrews, United Kingdom  
Kaushik Jayaram, University of Colorado, Boulder, USA  
Vivek Jayaraman, HHMI, Janelia Farm Research Campus, USA  
Bruce Jayne, University of Cincinnati, USA  
Raphael Jeanson, Centre National de la Recherche Scientifique (CNRS), France

Malgorzata Jefimow, Nicolaus Copernicus University, Poland  
Frants Jensen, Woods Hole Oceanographic Institution, USA  
Kim Jensen, Aarhus University, Denmark  
Łukasz Jermacz, Nicolaus Copernicus University, Poland  
Tim Jessop, Deakin University, Australia  
Lei Jiang, Chinese Academy of Sciences, China  
Devin Jindrich, California State University San Marcos, USA  
Anna Jirosova, Czech University of Life Sciences, Czech Republic  
Jean-François Joanny, College de France, France  
Anna-Christin Joel, RWTH Aachen University, Germany  
Ida Johansen, Norwegian University of Life Sciences, Norway  
Mark Johnson, Aarhus University, Denmark  
Amy Johnson, Bowdoin College, USA  
Joseph Johnson, Ohio University, USA  
Kristin Jonasson, Bat Conservation International, USA  
Gareth Jones, University of Bristol, United Kingdom  
Marc Jones, University College London, United Kingdom  
Ingemar Jonsson, Kristianstad University, Sweden  
Thorin Jonsson, University of Graz, Austria  
Michael Jonz, University of Ottawa, Canada  
Jens Joschinski, University of Gent, Belgium  
Vincent Joseph, Université Laval, Canada  
William Joyce, Aarhus University, Denmark  
Peter Jumars, University of Maine, USA  
Baumann Justin, University of North Carolina at Chapel Hill, USA  
Fredrik Jutfelt, Norwegian University of Science and Technology, Norway  
Stephen Kajiura, Florida Atlantic University, USA  
Svetlana Kalinina, Institute of Biology at Karelian Research Centre, Russian Federation  
Parthasarathy Kalyanasundaram, Case Western Reserve University, USA  
Ambika Kamath, University of California, Berkeley, USA  
Collins Kamunde, University of Prince Edward Island, Canada

Shane Kanatous, Colorado State University, USA

Vasileios Karalazos, BioMar, United Kingdom

William Karasov, University of Wisconsin, USA

Alexander Kasumyan, Moscow State University, Russian Federation

Akira Kato, Tokyo Institute of Technology, Japan

Paul Katz, University of Massachusetts, Amherst, USA

Reuben Kaufman, University of Alberta, Canada

Karla Kaun, Brown University, USA

Yuta Kawarasaki, Gustavus Adolphus College, USA

Almut Kelber, Lund University, Sweden

Laurent Keller, University of Lausanne, Switzerland

Scott Kelly, York University, Canada

Tosha Kelly, Louisiana State University, USA

Luke Kelly, The University of Queensland, Australia

Aubrey Kelly, Emory University, USA

Sean Kelly, San Diego State, USA

Ildiko Kemenes, University of Sussex, United Kingdom

Darrell Kemp, Macquarie University, Australia

Christopher Kenaley, Boston College, USA

Christopher Kennedy, Simon Fraser University, Canada

Melissa Kenny, Virginia Tech, USA

Dan Kerem, University of Haifa, Israel

Ellen Ketterson, Indiana University, USA

James Kezos, Sanford Burnham Prebys Medical Discovery Institute, USA

J. D. Kieffer, University of New Brunswick, Canada

David Kikuchi, Wissenschaftskolleg zu Berlin, Germany

Yumi Kim, Institute for Basic Science, Korea, Republic of Korea

Joel Kingsolver, University of North Carolina at Chapel Hill, USA

Alexandra Kingston, University of Tulsa, USA

Michiyo Kinoshita, Graduate University for Advanced Studies (Sokendai), Japan

Stephen Kinsey, University of North Carolina Wilmington, USA



Scott Kirkton, Union College, USA

John Kirwan, Lund University, Sweden

Tibor Kiss, Balaton Limnological Institute, Hungary

Tracy Kivell, University of Kent, United Kingdom

Jordan Klaiman, University of Washington, USA

Marco KleinHeerenbrink, University of Oxford, United Kingdom

Y. Çetin Kocaepe, Hacettepe University School of Medicine, Turkey

Joris Koene, Vrije University, Netherlands

Kevin Kohl, University of Pittsburgh, USA

Marek Konarzewski, University of Bialystok, Poland

Sergei Kondrashev, National Scientific Center of Marine Biology FEB RAS, Russian Federation

Nicolai Konow, University of Massachusetts Lowell, USA

Judith Korb, University of Freiburg, Germany

Konstantin Kornev, Clemson University, USA

Keith Korsmeyer, Hawaii Pacific University, USA

Vladimir Kostal, Academy of Sciences of the Czech Republic, Czech Republic

Rodger Kram, University of Colorado, USA

Jesse Krause, University of Nevada, Reno, USA

Harald Krenn, University of Vienna, Austria

Anand Krishnan, Indian Institute of Science Education and Research, India

Natraj Krishnan, Mississippi State University, USA

Randolf Krohmer, Saint Xavier University, USA

Dietmar Kueltz, University of California, Davis, USA

Holger Kühnhold, Leibniz Center for Tropical Marine Research (ZMT), Germany

Vinod Kumar, University of Delhi, India

Yoko Kunimasa, Osaka University of Health and Sport Sciences, Japan

Deborah Kurrasch, University of Calgary, Canada

Christina Kwapich, Arizona State University, USA

Fred Laberge, University of Guelph, Canada

David Labonte, University of Cambridge, United Kingdom

Travis LaDuc, University of Texas at Austin, USA

Sabine Lague, University of British Columbia, Canada  
Simon Lailvaux, The University of New Orleans, USA  
Simon Lamarre, University of Moncton, Canada  
Andrew Lammers, Cleveland State University, USA  
Michael Land, University of Sussex, United Kingdom  
Amy Lang, University of Alabama, USA  
Chris Langdon, University of Miami, USA  
Angela Lange, University of Toronto Mississauga, Canada  
Anthony Lapsansky, University of Montana, USA  
Susan Larson, Stony Brook University, USA  
George Lauder, Harvard University, USA  
John Layne, University of Cincinnati, USA  
Jack Layne, Slippery Rock University of Pennsylvania, USA  
Claudio Lazzari, University of Tours, France  
Kwang Lee, Seoul National University, Republic of Korea  
David Lee, University of Nevada Las Vegas, USA  
Erin Lee, Queen's University, Canada  
David Lee, University of Nevada Las Vegas, USA  
Sjannie Lefevre, University of Oslo, Norway  
Philipp Lehmann, Stockholm University, Sweden  
Fritz Lehmann, University of Rostock, Germany  
Duncan Leitch, University of British Columbia, Canada  
Frédéric Lemaître, University of Rouen, France  
Pierre Lemelin, University of Alberta, Canada  
Helene Lemieux, University of Alberta, Canada  
Christophe LeMoine, Brandon University, Canada  
Birgit Lengerer, University of Innsbruck, Austria  
David Lentink, Stanford University, USA  
Janet Leonard, University of California, Santa Cruz, USA  
Danielle Levesque, University of Maine, USA  
Ofir Levy, Tel Aviv University, Israel

Agnès Lewden, University of Leeds, United Kingdom

John Lewis, University of Ottawa, Canada

Oleg Lewkowski, Martin-Luther-University Halle Wittenberg, Germany

Fuhua Li, Chinese Academy of Sciences, China

Xinping Li, Guangdong Provincial People's Hospital, China

Hou-Feng Li, National Chung Hsing University, Taiwan

Gen Li, Japan Agency for Marine-Earth Science and Technology (JAMSTEC), Japan

James Liao, University of Florida, USA

Wen Bo Liao, China West Normal University, China

Diana Liao, University of Tübingen, Germany

Frederic Libersat, Ben Gurion University, Israel

Richard Lieber, Northwestern University, USA

Daniel Lieberman, Harvard University, USA

John Lighton, University of Nevada at Las Vegas, USA

Michael Lim, University of Guelph, Canada

David Lin, Washington State University, USA

Erjun Ling, Institute of Plant Physiology and Ecology, China

Sara Lipshutz, Indiana University Bloomington, USA

Alexander Little, University of California, Santa Barbara, USA

Hao Liu, Chiba University, Japan

Molly Liu, University of Minnesota, USA

Violaine Llaurens, Muséum National d'Histoire Naturelle, France

Phil Lobel, Boston University, USA

Brent Lockwood, University of Vermont, USA

Jaanis Lodjak, University of Tartu, Estonia

Ellis Loew, Cornell University, USA

Cheryl Logan, California State University, Monterey Bay, USA

David Logue, University of Lethbridge, Canada

Kenneth Lohmann, University of North Carolina, USA

Catherine Lohmann, University of North Carolina, USA

Richard Londravage, University of Akron, USA

Catherine Lorin-Nebel, University Montpellier, France  
Vicki Losick, Boston College, USA  
Matthieu Louis, University of California, Santa Barbara, USA  
J. R. Lovvorn, Southern Illinois University, USA  
Kelsey Lucas, University of Michigan, USA  
Magnus Lucassen, Alfred Wegener Institute, Germany  
Katharina Lust, Dresden University of Technology, Germany  
Naim M. Bautista, Aarhus University, USA  
Huub Maas, Vrije Universiteit Amsterdam, Netherlands  
HaDi MaBouDi, University of Sheffield, United Kingdom  
Brian MacIntosh, University of Calgary, Canada  
Malcolm Maciver, Northwestern University, USA  
Heath MacMillan, Carleton University, Canada  
Craig Magie, Quinnipiac University, USA  
Robert Magrath, Australian National University, Australia  
Anabela Maia, Rhode Island College, USA  
Ali Malay, Riken Advanced Science Institute, Japan  
Jessica Malisch, St Mary's College of Maryland, USA  
Shane Maloney, University of Western Australia, Australia  
Hans Malte, University of Aarhus, Denmark  
Milica Mandic, University of California, Davis, USA  
Geoffrey Manley, University of Oldenburg, Germany  
Alf Mansson, Linnaeus University, Sweden  
James Marden, Pennsylvania State University, USA  
Ali Marjaninejad, University of Southern California, Los Angeles, USA  
Luis Marques-Santos, Universidade Federal da Paraiba, Brazil  
Rich Marsh, Brown University, USA  
William Marshall, St Francis Xavier University, Canada  
Dustin Marshall, Monash University, Australia  
Katie Marshall, University of British Columbia, Canada  
D. John Martell, Fisheries and Oceans Canada, Canada

Jean-Rene Martin, CNRS/Université Paris-Sud, France

Karen Martin, Pepperdine University, USA

James Martin, University of Utah, USA

Sandy Martin, University of Colorado School of Medicine, USA

A. Martinez, Universidad Nacional Autónoma de México, Mexico

Karen Maruska, Louisiana State University, USA

Robert Mason, Oregon State University, USA

Lydia Mathger, Marine Biological Laboratory, USA

Mackenzie Mathis, Swiss Federal Institute of Technology, Switzerland

Kimberley Mathot, University of Alberta, Canada

Joanna Matos, Eastern Washington University, USA

Kouhei Matsuda, University of Toyama, Japan

Philip Matthews, University of British Columbia, Canada

Holly May, Brock University, Canada

Christopher Mayerl, Clemson University, USA

Soudeh Mazharmanesh, University of New South Wales, Australia

Erin McCallum, Swedish University of Agricultural Sciences, Sweden

John McCarthy, University of Kentucky, USA

David McClay, Duke University, USA

Grant McClelland, McMaster University, Canada

Stephen McCormick, University of Massachusetts, Amherst, USA

M. Danielle McDonald, RSMAS, University of Miami, USA

Allison McDonald, Wilfrid Laurier University, Canada

Birgitte McDonald, Moss Landing Marine Laboratories, USA

Eric McElroy, College of Charleston, USA

Iain McGaw, Memorial University of Newfoundland, Canada

Craig McGowan, University of Idaho, USA

Matthew McHenry, University of California, Irvine, USA

Andrew McKechnie, University of Pretoria, South Africa

David McKenzie, University of Montpellier, France

Darryl McLennan, University of Glasgow, United Kingdom

Brian McNab, University of Florida, USA

John McNamara, University of São Paulo, Brazil

Todd McWhorter, University of Adelaide, Australia

Scott Medler, St Bonaventure University, USA

Rita Mehta, University of California, Santa Cruz, USA

Markus Meister, California Institute of Technology, USA

Johan Melis, California Institute of Technology, USA

Elton Melo, Lund University, Sweden

Frank Melzner, Geomar, Germany

Leah Mendelson, Harvey Mudd College, USA

Rachel Menegaz, University of North Texas, USA

Jan Mennigen, University of Ottawa, Canada

Allen Mensinger, University of Minnesota Duluth, USA

Florian Menzel, Johannes Gutenberg University, Germany

Alison Mercer, University of Otago, New Zealand

Mark Merchant, McNeese State University, USA

Meredith Johnson, Arizona State University, USA

Rachel Merz, Swarthmore College, USA

Neil Metcalfe, University of Glasgow, United Kingdom

Bradley Metz, North Carolina State University, USA

Megan Meuti, Ohio State University, USA

Axel Meyer, University of Konstanz, Germany

V. B. Meyer-Rochow, Research Institute of Luminescent Organisms, Japan

Natasha Mhatre, University of Western Ontario, Canada

Basile Michaelidis, Aristotle University of Thessaloniki, Greece

Ondřej Michálek, Masaryk University, Czech Republic

Monika Mierzejewski, University of Alberta, Canada

Joanna Miest, University of Greenwich, United Kingdom

Laura Miller, University of North Carolina at Chapel Hill, USA

William Milsom, University of British Columbia, Canada

Sarah Milton, Florida Atlantic University, USA

Michael Minicozzi, Northern Arizona University, USA  
Payam Mirshams Shashahani, University of Michigan, USA  
John Misiaszek, University of Alberta, Canada  
Duncan Mitchell, University of Witwatersrand, South Africa  
Nicola Mitchell, The University of Western Australia, Australia  
Rajat Mittal, Johns Hopkins University, USA  
Makoto Mizunami, Hokkaido University, Japan  
Nadja Mobjerg, University of Copenhagen, Denmark  
Karla Moeller, Arizona State University, USA  
Joachim Mogdans, University of Bonn, Germany  
Jenna Monroy, Claremont Colleges, USA  
John Montgomery, University of Auckland, New Zealand  
Thomas Moon, University of Ottawa, Canada  
Brad Moon, University of Louisiana at Lafayette, USA  
Paul Moore, Bowling Green State University, USA  
Ignacio Moore, Virginia Tech, USA  
Talia Moore, University of Michigan, USA  
Isabel Moore, Cardiff Metropolitan University, United Kingdom  
Talia Moore, University of Michigan, USA  
Clinton Moran, The Citadel, USA  
Julie Morand-Ferron, University of Ottawa, Canada  
Andrea Morash, Mount Allison University, Canada  
David Morgan, Monash University, Australia  
Masaya Morita, University of the Ryukyus, Japan  
Chet Moritz, University of Washington, USA  
Leonid Moroz, University of Florida, USA  
Nicole Moyen, Stanford University, USA  
Florian Muijres, Wageningen University, Netherlands  
Philip Munday, James Cook University, Australia  
Martha Munoz, Virginia Polytechnic Institute and State University, USA  
Agus Munoz-Garcia, The Ohio State University, USA

Daniel Munro, Université du Québec à Rimouski, Canada

David Murphy, University of South Florida, USA

Laura Musselman, Binghamton University, USA

Felicity Muth, University of Texas at Austin, USA

Kwezi Mzilikazi, Nelson Mandela University, South Africa

Paul Nachtigall, University of Hawaii, USA

Shiva nag Kompella, University of Manchester, United Kingdom

Kamil Najberek, Polish Academy of Sciences, Poland

Kensuke Nakata, Kyoto Women's University, Japan

Tomoko Narazaki, The University of Tokyo, Japan

Ajay Narendra, Macquarie University, Australia

Joacim Näslund, Stockholm University, Sweden

Jennifer Nauen, University of Delaware, USA

Kristen Navara, The Ohio State University, USA

Isabel Navarro, University of Barcelona, Spain

Benjamin Navia, Andrews University, USA

Nicolas Nazar, National University of Cordoba, Argentina

Ximena Nelson, University of Canterbury, New Zealand

Jay Nelson, Towson University, USA

Dinu Nesan, University of Calgary, Canada

Roberto Nespolo, Universidad Austral de Chile, Chile

Anna Nesterova, Oxford University, United Kingdom

Lori Neuman-Lee, Arkansas State University, USA

Marie Nevoux, French National Institute for Agriculture, Food and Environment, France

Richard Nichols, Georgia Institute of Technology, USA

Andreas Nieder, University of Tübingen, Germany

Peter Niewiarowski, University of Akron, USA

Mikko Nikinmaa, University of Turku, Finland

Goran Nilsson, University of Oslo, Norway

Helen Nilsson Sköld, Gothenborg University, Sweden

Kiisa Nishikawa, Northern Arizona University, USA



Vivek Nityananda, Newcastle University, United Kingdom  
Jeremy Niven, University of Sussex, United Kingdom  
Som Niyogi, University of Saskatchewan, Canada  
Thomas Nolen, State University of New York, New Paltz, USA  
Andreas Nord, Lund University, Sweden  
Karin Nordstrom, Flinders University, Australia  
Tommy Norin, Technical University of Denmark, Denmark  
Fabian Norry, University of Buenos Aires, Argentina  
Caleb Northam, University of Manitoba, Canada  
Anna Nousek-McGregor, University of Glasgow, United Kingdom  
Colleen Novak, Kent State University, USA  
Julia Nowack, Liverpool John Moores University, United Kingdom  
Richard Nuckols, Harvard University, USA  
Patricia Nunes-Silva, Unisinos, Brazil  
Elizabeth Nyboer, McGill University, Canada  
Clint Oakley, Victoria University of Wellington, New Zealand  
Diane O'Brien, University of Alaska Fairbanks, USA  
D. C. O'Carroll, Lund University, Sweden  
Lauren O'Connell, Stanford University, USA  
Grace O'Connell, University of California, Berkeley, USA  
Karen Ocorr, Sanford Burnham Prebys Medical Discovery Institute, USA  
Michael O'Donnell, McMaster University, Canada  
Sean O'Donnell, Drexel University, USA  
Marlene Oefele, Max Planck Institute for Ornithology, Germany  
Phillip Oelbaum, University of Toronto Scarborough, Canada  
Yuri Ogawa, Flinders University, Australia  
Shinji Okada, University of Tokyo, Japan  
Monika Okuliarova, Comenius University, Slovakia  
Olawande Olagoke, Universidade Federal de Santa Maria, Brazil  
Jeffrey Olberding, University of California, Irvine, USA  
Catharina Olsson, University of Gothenburg, Sweden

Caley Orr, University of Colorado School of Medicine, USA  
Daniel Osorio, University of Sussex, United Kingdom  
Yasemin Ozkan Aydin, Georgia Institute of Technology, USA  
D. Ann Pabst, University of North Carolina Wilmington, USA  
Daniela Silvia Pace, Sapienza University of Rome, Italy  
Aude Pacini, University of Hawaii, USA  
Gary Packard, Colorado State University, USA  
Daniel Padfield, University of Exeter, United Kingdom  
Pamela Padilla, University of North Texas, USA  
Anthony Pagano, University of California, Santa Cruz, USA  
Ravindra Palavalli-Nettimi, Macquarie University, Australia  
Jean-Paul Paluzzi, York University, Canada  
Francis Pan, University of Southern California, USA  
Mark Pankow, North Carolina State University, USA  
Rannyele Passos Ribeiro, Autonomous University of Madrid, Spain  
Andrius Pašukonis, Stanford University, USA  
Angelique Paulk, Massachusetts General Hospital, USA  
Jan Pechenik, Tufts University, USA  
Michael Pedersen, Aarhus University Hospital, Denmark  
Stano Pekar, Masaryk University, Czech Republic  
Ken Pelkey, National Institutes of Health, USA  
Hodjat Pendar, Virginia Tech, USA  
Germán Pequera, University of the Republic, Uruguay  
Marcos Pereira, Institute of Biological Sciences (ICB), Brazil  
Jonathan Perelmuter, Cornell University, USA  
Andrei Peressadko, Samsung Research Center, Russian Federation  
Jonathan Perez, University of Glasgow, United Kingdom  
Verónica Pérez Schuster, University of Buenos Aires, Argentina  
J. Perez-Rigueiro, Universidad Politecnica de Madrid, Spain  
Steve Perry, University of Ottawa, Canada  
Jacob Peters, Harvard University, USA

Amanda Pettersen, Lund University, Sweden  
John B. Phillips, Virginia Tech, USA  
Stephen Piazza, Pennsylvania State University, USA  
Theunis Piersma, Royal Netherlands Institute for Sea Research, Netherlands  
Jose Pietri, Apex Bait Technologies, Inc., USA  
Peter Pilz, University of Tübingen, Germany  
Sylvain Pincebourde, Université François Rabelais, France  
Primoz Pirih, University of Ljubljana, Slovenia  
Christian Pirk, University of Pretoria, South Africa  
Helmut Plattner, University of Konstanz, Germany  
Jeff Podos, University of Massachusetts, Amherst, USA  
Jason Podrabsky, Portland State University, USA  
Nuria Polo-Cavia, Universidad Autónoma de Madrid, Spain  
Paul Ponganis, University of California, San Diego, USA  
Herman Pontzer, Duke University, USA  
Arthur Popper, University of Maryland, USA  
Megan Porter, University of Hawai'i at Manoa, USA  
Hans-Otto Pörtner, Alfred-Wegener-Institute, Germany  
Frank Powell, University of California, San Diego, USA  
Don Powers, George Fox University, USA  
Alice Powers, Stony Brook University, USA  
Matthew Powers, Auburn University, USA  
Anupama Prakash, National University of Singapore, Singapore  
Stephen Pratt, Arizona State University, USA  
Kenneth Prestwich, College of the Holy Cross, USA  
Edwin Price, University of North Texas, USA  
Rosalyn Price-Waldman, Princeton University, USA  
Boris Prilutsky, Georgia Institute of Technology, USA  
David Pritchard, University of Stirling, United Kingdom  
Richard Prum, Yale University, USA  
Marina Psalti, Johannes Gutenberg University, Germany

Igor Pushchin, National Scientific Center of Marine Biology FEB RAS, Russian Federation

Nathan Putman, LGL Ecological Research Associates, USA

Hollie Putnam, University of Rhode Island, USA

Joy Putney, Georgia Institute of Technology, USA

Nicholas Pyenson, Smithsonian Institution, USA

R. Suma Harikumar, Indian Institute of Science, USA

Craig Radford, University of Auckland, New Zealand

Vrishank Raghav, Auburn University, USA

Clifton Ragsdale, University of Chicago, USA

Robert Raguso, Cornell University, USA

Michael Rainbow, Queen's University, Canada

Brent Raiteri, Ruhr University Bochum, Germany

Kanmani Rajan, Hong Kong University, China

Ramakrishnan Rajarajan, Czech University of Life Sciences, Czech Republic

Marilyn Ramenofsky, University of California, Davis, USA

Leonor Ramirez, Instituto de Investigaciones Biológicas, Argentina

Dinesh Rao, Universidad Veracruzana, Mexico

Jonathan Rast, University of Toronto, Canada

John Ratcliffe, University of Toronto, Canada

Sridhar Ravi, University of New South Wales, Australia

Lorrie Rea, University of Alaska Fairbanks, USA

Lorena Rebecchi, University of Modena and Reggio Emilia, Italy

Adam Reddon, Liverpool John Moores University, United Kingdom

Michael Reed, Tufts University, USA

DeeAnn Reeder, Bucknell University, USA

Bernard Rees, University of New Orleans, USA

Matthew Regan, University of Wisconsin–Madison, USA

Michael Reichert, Oklahoma State University, USA

Matthew Reidenbach, University of Virginia, USA

Tormey Reimer, Monash University, Australia

Darcy Reisman, University of Delaware, USA

David Renault, University of Rennes, France

Susan Renn, Reed College, USA

Gillian Renshaw, Griffith University, Australia

Julie Reynolds, Ohio State University, USA

Heather Rhodes, Denison College, USA

Aaron Rice, Cornell University, USA

Jeff Richards, University of British Columbia, Canada

Christopher Richards, Royal Veterinary College, United Kingdom

Eric Riddell, University of California, Berkeley, USA

Ryan Riddick, The University of Queensland, Australia

Sam Ridgway, National Marine Mammal Foundation, USA

Tobias Riede, Midwestern University, USA

Jeff Riffell, University of Washington, USA

Elisa Rigosi, Lund University, Sweden

Thorsten Ritz, University of California, Irvine, USA

Karla Rivera Caceres, Florida International University, USA

Angela Rizzo, University of Milan, Italy

Neil Roach, Harvard University, USA

Daniel Robert, University of Bristol, United Kingdom

Théo Robert, University of Exeter, United Kingdom

Thomas Roberts, Brown University, USA

Riccardo Rodolfo-Metalpa, Université de La Réunion, New Caledonia

Rafael Rodriguez, University of Wisconsin-Milwaukee, USA

Kim Roelants, Vrije Universiteit Brussel, Belgium

Ellen Roelfsema, University of Utrecht, Netherlands

Lesley Rogers, University of New England, Australia

Louise Rollins-Smith, Vanderbilt University, USA

Erika Roman, Swedish University of Agricultural Sciences, Sweden

Lawrence Rome, University of Pennsylvania, USA

Michael Romero, Mayo Clinic College of Medicine, USA

Bernhard Ronacher, Humboldt-University, Germany

Ivo Ros, Harvard University, USA

Michael Rosario, West Chester University, USA

Denis Rosemberg, Federal University of Santa Maria, Brazil

Callum Ross, University of Chicago, USA

Eatai Roth, Indiana University, USA

Adrian Rothenfluh, University of Utah, USA

David Roubik, Smithsonian Tropical Research Institute, Panama

Damien Roussel, University Lyon 1, France

Francois Rouyer, Institut de Neurobiologie Alfred Fessard, France

Michael Rowley, Brown University, USA

Jerome Roy, INRAE, France

Lajos Rozsa, Hungarian Academy of Sciences, Hungary

Jonas Rubenson, Pennsylvania State University, USA

Tommaso Ruberto, Liverpool John Moores University, United Kingdom

Thomas Ruf, University of Veterinary Medicine, Austria

Rosa Rugani, University of Padova, Italy

Simon Rundle, University of Plymouth, United Kingdom

Travis Rusch, Texas A&M University, USA

Ian Russell, University of Brighton, United Kingdom

Anthony Russell, University of Calgary, Canada

Suvi Ruuskanen, University of Turku, Finland

Jeremy Ryan, Cornell University, USA

Sakthivel Sadayappan, University of Cincinnati, USA

Edyta Sadowska, Jagiellonian University, Poland

Julita Sadowska, University of Bialystok, Poland

Vasav Sahni, University of Akron, USA

William Saidel, Rutgers University, USA

Scott Sakaluk, Illinois State University, USA

Akira Sakurai, Georgia State University, USA

Mary Salcedo, Virginia Tech, USA

Karine Salin, Ifremer, France

Pablo Salmon, University of Glasgow, United Kingdom  
Alexandre Sampaio, Federal University of Ceará, Brazil  
Aravinthan Samuel, Harvard University, USA  
Erik Sandblom, Göteborg University, Sweden  
S. Laurie Sanderson, College of William and Mary, USA  
Franziska Sandmeier, Colorado State University Pueblo, USA  
Sanjay Sane, National Center for Biological Sciences, India  
Harshada Sant, University of Massachusetts, Amherst, USA  
Marco Santello, Arizona State University, USA  
Arvind Santhanakrishnan, Oklahoma State University, USA  
Joseph Santin, University of North Carolina at Greensboro, USA  
Mauro Santos, Autonomous University of Barcelona, Spain  
Romana Santos, Marine and Environmental Sciences Centre, University of Lisbon, Portugal  
Cecile Sarabian, Kyoto University, Japan  
Peter Sarkies, Imperial College London, United Kingdom  
Ken Sasaki, Tamagawa University, Japan  
Katsufumi Sato, University of Tokyo, Japan  
Hirotaka Sato, Nanyang Technological University, Singapore  
Akira Sato, Okayama University, Japan  
Richard Satterlie, University of North Carolina Wilmington, USA  
Gregory Sawicki, Georgia Institute of Technology, USA  
Elliot Scanes, The University of Sydney, Australia  
Michael Scantlebury, Queens University Belfast, United Kingdom  
Paul Schaeffer, Miami University, USA  
Thomas Scheibel, University of Bayreuth, Germany  
Ricarda Scheiner, University of Würzburg, Germany  
Ingo Schiffner, Bangor University, United Kingdom  
Rudolf Schilder, Pennsylvania State University, USA  
Oliver Schmachtenberg, University of Valparaiso, Chile  
Daniel Schmitt, Duke University, USA  
Anke Schmitz, Rheinische-Friedrich-Wilhelms University of Bonn, Germany

Katrina Schrode, Johns Hopkins School of Medicine, USA  
Patricia Schulte, University of British Columbia, Canada  
Stefan Schuster, University of Bayreuth, Germany  
Margot Schwalbe, Lake Forest College, USA  
Lisa Schwanz, University of Canberra, Australia  
Sebastian Schwarz, Paul Sabatier University Toulouse, France  
Thorsten Schwerte, University of Innsbruck, Austria  
Stephen Secor, University of Alabama, USA  
Frank Seebacher, University of Sydney, Australia  
Nidhi Seethapathi, University of Pennsylvania, USA  
Marion Segall, American Museum of Natural History, USA  
Ronen Segev, Ben Gurion University of the Negev, Israel  
Helmut Segner, University of Bern, Switzerland  
Brad Seibel, University of South Florida, USA  
Jessica Selinger, Queen's University, Canada  
Colin Selman, University of Glasgow, United Kingdom  
Mary Sewell, University of Auckland, New Zealand  
Roger Seymour, University of Adelaide, Australia  
Robert Shadwick, University of British Columbia, Canada  
Scott Shaffer, San José State University, USA  
Imad Shams, University of Haifa, Israel  
Camilla Sharkey, University of Minnesota, USA  
Neelima Sharma, Yale University, USA  
Nadav Shashar, Ben Gurion University of the Negev, Israel  
Matthew Shawkey, University of Ghent, Belgium  
Sandra Shefelbine, Northeastern University, USA  
Lirong Shen, Zhejiang University, China  
Holly Shiels, University of Manchester, United Kingdom  
J. Mark Shrimpton, University of Northern British Columbia, Canada  
Lynnette Sievert, Emporia State University, USA  
Keith Sillar, University of St Andrews, United Kingdom



Carlos Silva, Federal University of Santa Catarina, Brazil  
Valentina Silva-Pereyra, University of the Republic, Uruguay  
Cheolho Sim, Baylor University, USA  
James Simmons, Brown University, USA  
Andrea Simmons, Brown University, USA  
Ralph Simon, Vrije University Amsterdam, Netherlands  
Mike Simone-Finstrom, US Department of Agriculture, USA  
Mirre Simons, University of Sheffield, United Kingdom  
Brent Sinclair, University of Western Ontario, Canada  
Michael Singer, Wesleyan University, USA  
John Skedros, Utah Orthopaedic Specialists, USA  
Hans Slabbekoorn, Leiden University, Netherlands  
Kath Sloman, University of the West of Scotland, United Kingdom  
Kathleen Smith, Duke University, USA  
G. Troy Smith, Indiana University, USA  
Frank Smith, Dalhousie University, Canada  
Adrian Smith, North Carolina Museum of Natural Sciences, USA  
Geoffrey Smith, Dixie State University, USA  
Tobias Smith, The University of Queensland, Australia  
Michael Smotherman, Texas A&M University, USA  
Lynne Sneddon, University of Liverpool, United Kingdom  
Daphne Soares, New Jersey Institute of Technology, USA  
Jake Socha, Virginia Tech, USA  
Jose Soengas, University of Vigo, Spain  
Inna Sokolova, Rostock University, Germany  
Hema Somanathan, Indian Institute of Science Education and Research, India  
George Somero, Hopkins Marine Station, USA  
Taejeong Song, University of Cincinnati, USA  
Gabriele Sorci, University of Bourgogne, France  
Peter Sorensen, University of Minnesota, USA  
Jesper Sørensen, Aarhus University, Denmark

Johannes Spaethe, University of Würzburg, Germany  
Carol Sparling, University of St Andrews, United Kingdom  
John Speakman, University of Aberdeen, United Kingdom  
Ben Speers-Roesch, University of New Brunswick, Canada  
Andrew Spence, Temple University, USA  
John Spicer, University of Plymouth, United Kingdom  
Rebecca Spokony, Baruch College, USA  
Simon Sponberg, Georgia Institute of Technology, USA  
Mandyam Srinivasan, University of Queensland, Australia  
Manoj Srinivasan, Ohio State University, USA  
Anton Stabentheiner, University of Graz, Austria  
Zach Stahlschmidt, University of the Pacific, USA  
Emily Standen, University of Ottawa, Canada  
David Stanley, USA Department of Agriculture, USA  
Dara Stanley, University College Dublin, Ireland  
Alyssa Stark, Villanova University, USA  
Doekele Stavenga, University of Groningen, Netherlands  
Clare Stawski, Norwegian University of Science and Technology, Norway  
Charles Stayton, Bucknell University, USA  
Jonathan Stecyk, University of Alaska Anchorage, USA  
Lukasz Stelinski, University of Florida, USA  
Sarah Stellwagen, University of Maryland, Baltimore County, USA  
Monika Stengl, University of Kassel, Germany  
Marcus Stensmyr, Lund University, Sweden  
Don Stevens, University of Prince Edward Island, Canada  
James Stewart, East Tennessee State University, USA  
Russell Stewart, University of Utah, USA  
Jonathon Stillman, San Francisco State University, USA  
Mary Stoddard, Princeton University, USA  
Anna Stoeckl, University of Würzburg, Germany  
Kenneth Storey, Carleton University, Canada

Mason Stothart, University of Guelph, Canada  
Hans Straka, Ludwig-Maximilians-Universität München, Germany  
Richard Strathmann, University of Washington, USA  
Volko Straub, University of Leicester, United Kingdom  
Martin Streinzer, University of Vienna, Austria  
Craig Stricker, USA Geological Survey, USA  
James Strother, University of Florida, USA  
Andreas Stumpner, Georg-August University of Göttingen, Germany  
Meike Stumpp, Christian-Albrechts-University Kiel, Germany  
Chih-Ying Su, University of California, San Diego, USA  
Raul Suarez, University of British Columbia, Canada  
Andrew Suarez, University of Illinois, USA  
Joanna Sudyka, Jagiellonian University, Poland  
Cliff Summers, University of South Dakota, USA  
Josefin Sundin, Swedish University of Agricultural Sciences, Sweden  
Line Sundt-Hansen, Norwegian Institute for Nature Research, Norway  
Diego Sustaita, California State University San Marcos, USA  
Kelly Sutherland, University of Oregon, USA  
Gregory Sutton, University of Lincoln, United Kingdom  
Marie Suver, NYU Langone, USA  
Miwa Suzuki, Nihon University, Japan  
Glenn Svensson, Lund University, Sweden  
David Swanson, University of South Dakota, USA  
Sharon Swartz, Brown University, USA  
Stephen Swearer, University of Melbourne, Australia  
Karen Sweazea, Arizona State University, USA  
Douglas Syme, University of Calgary, Canada  
Matthew Symonds, Deakin University, Australia  
Paul Szyszka, University of Otago, New Zealand  
Dennis Tabuena, San Francisco State University, USA  
David Tadres, University of California, Santa Barbara, USA

Elly Tanaka, Dresden University of Technology, Germany  
Ryosuke Tanaka, Yale University, USA  
Jessica Tanner, University of Western Australia, Australia  
Anna Tansik, University of Georgia, USA  
Aaron Tarone, Texas A&M University, USA  
Glenn Tattersall, Brock University, Canada  
Eran Tauber, University of Haifa, Israel  
Ryan Taylor, Salisbury University, USA  
Jennifer Taylor, Scripps Institution of Oceanography, USA  
Emily Taylor, California Polytechnic State University, USA  
Lucy Taylor, University of Oxford, United Kingdom  
Kenneth Taylor, Florida State University, USA  
Matthew Taylor, University of Birmingham, United Kingdom  
Ryan Taylor, Salisbury University, USA  
Ofer Tchernichovski, Hunter College, USA  
Nicholas Teets, University of Kentucky, USA  
Melisandre Tefit, University of Hawaii, USA  
Francismeire Telles, Federal University of Uberlândia, Brazil  
Carel ten Cate, Leiden University, Netherlands  
Jason Tenneson, Indiana University Bloomington, USA  
John Terblanche, Stellenbosch University, South Africa  
John Terhune, University of New Brunswick, Canada  
Eva Terzibasi Tozzini, Stazione Zoologica Anton Dohrn of Naples, Italy  
Kannan Thandavan Arthanari, Tamil Nadu Veterinary and Animal Sciences University, India  
Jamie Theobald, Florida International University, USA  
Leslie Theunissen, Ulm University, Germany  
J. G. M. Thewissen, Northeast Ohio Medical University, USA  
Jeffrey Thomason, University of Guelph, Canada  
Joseph Thompson, Franklin & Marshall College, USA  
Mike Thompson, University of Sydney, Australia  
Charles Thompson, Illinois State University, USA

Nathan Thompson, NYIT College of Osteopathic Medicine, USA  
Carl Thurman, University of Northern Iowa, USA  
Fang-Bao Tian, University of New South Wales, Australia  
Ann Tierney, Colgate University, USA  
Vallo Tilgar, Tartu University, Estonia  
Bret Tobalske, University of Montana, USA  
Anne Todgham, University of California, Davis, USA  
Moshe Tom, Israel Oceanographic and Limnological Research, Israel  
Lars Tomanek, California Polytechnic State University, USA  
Kenji Tomioka, Okayama University, Japan  
Daniel Tomsic, University of Buenos Aires (CONICET), Argentina  
Matthew Toomey, University of Tulsa, USA  
Lluís Tort, Autonomous University of Barcelona, Spain  
Mark Townley, University of New Hampshire, USA  
Jason Treberg, University of Manitoba, Canada  
Rejean Tremblay, University of Quebec at Rimouski, Canada  
Martin Tresguerres, University of California, San Diego, USA  
Elena Tricarico, University of Florence, Italy  
Tilman Triphan, University of Leipzig, Germany  
Vincent Tropepe, University of Toronto, Canada  
Manuela Truebano, Plymouth University, United Kingdom  
Katie Tschida, Cornell University, USA  
Michelle Tseng, University of British Columbia, Canada  
Jun-ichi Tsuboi, Japan Fisheries Research and Education Agency, Japan  
Masahito Tsuboi, Lund University, Sweden  
Travis Tune, Georgia Institute of Technology, USA  
Zeynep Turan, California Institute of Technology, USA  
Andy Turko, McMaster University, Canada  
Lillian Tuttle, University of Hawaii at Manoa, USA  
Richard Tuxworth, University of Birmingham, United Kingdom  
Cornelia Twining, Cornell University, USA

Eric Tytell, Tufts University, USA

Brian Umberger, University of Michigan, USA

Suraj Unniappan, University of Saskatchewan, Canada

James Usherwood, Royal Veterinary College, United Kingdom

Alberto Vailati, University of Milan, Italy

Vera Val, National Institute for Research of the Amazon, Brazil

Teresa Valencak, Veterinary University Vienna, Austria

Megan Valentine, State University of New York, USA

Dario Riccardo Valenzano, Max Planck Institute for Biology of Ageing, Germany

Francisco Valero-Cuevas, University of Southern California, Los Angeles, USA

Giorgio Vallortigara, University of Trento, Italy

Floris van Breugel, California Institute of Technology, USA

Raoul Van Damme, University of Antwerp, Belgium

Thomas van de Kamp, Karlsruhe Institute of Technology, Germany

Wynand Van der Goes Van Naters, Cardiff University, United Kingdom

Arie van der Meijden, University of Porto, Portugal

Johan van Leeuwen, Wageningen University, Netherlands

Matthew Van Sant, Cameron University, USA

Bruno van Swinderen, Queensland Brain Institute, Australia

Sam Van Wassenbergh, University of Antwerp, Belgium

Bram Vanthournout, University of Ghent, Belgium

Oscar Vedder, University of Groningen, Netherlands

Jonathan Velotta, University of Denver, USA

Thiyagarajan Vengatesen, Hong Kong University, China

Madhusudhan Venkadesan, Yale University, USA

Radhika Venkatesan, National Centre for Biological Sciences, India

Alexander Venn, Scientific Center of Monaco, Monaco

Wilco Verberk, Animal Ecology and Physiology, Netherlands

Evie Vereecke, University of Leuven, Belgium

Simon Verhulst, University of Groningen, Netherlands

Ben Vernasco, Washington State University, USA

Frank Verstraete, University of California, Davis, USA  
Francois Vezina, University of Quebec at Rimouski, Canada  
Matt Vickaryous, University of Guelph, Canada  
Matt Vijayan, University of Calgary, Canada  
Clement Vinauger, Virginia Tech, USA  
Heiko Vogel, Max Planck Institute for Chemical Ecology, Germany  
Katrin Vogt, University of Konstanz, Germany  
Dagmar Voigt, Technical University of Dresden, Germany  
Janek von Byern, Ludwig Boltzmann Institute for Experimental and Clinical Traumatology, Austria  
Sophie von Merten, University of Aveiro, Portugal  
Loke von Schmalensee, Stockholm University, Sweden  
Matti Vornanen, University of Eastern Finland, Finland  
Misha Vorobyev, University of Auckland, New Zealand  
Charles Vossbrinck, Connecticut Agricultural Experiment Station, USA  
Peter Wainwright, University of California, Davis, USA  
Dylan Wainwright, Harvard University, USA  
James Wakeling, Simon Fraser University, Canada  
Aleksandra Walczynska, Jagiellonian University, Poland  
Lindsay Waldrop, Chapman University, USA  
Jeffrey Walker, University of Southern Maine, USA  
Robert Walker, Southampton Hospital, United Kingdom  
Kirsty Wan, University of Exeter, United Kingdom  
Tobias Wang, Aarhus University, Denmark  
De-Hua Wang, Chinese Academy of Sciences, China  
Youji Wang, Shanghai Ocean University, China  
Andrea Ward, Adelphi University, USA  
Trevor Wardill, Marine Biological Laboratory, USA  
Dan Warner, Auburn University, USA  
Mark Warner, University of Delaware, USA  
Daniel Warren, Saint Louis University, USA  
Timothy Warren, University of Washington, USA

Douglas Warrick, Oregon State University, USA

Yuuki Watanabe, National Institute of Polar Research, Japan

Soichi Watanabe, The University of Tokyo, Japan

Hannah Watson, Lund University, Sweden

Heather Watts, Washington State University, USA

Jacqueline Webb, University of Rhode Island, USA

Jonathan Webb, The University of Technology Sydney, Australia

Jean-Michel Weber, University of Ottawa, Canada

Christian Wegener, University of Würzburg, Germany

Youheng Wei, Yangzhou University, China

Dirk Weihrauch, University of Manitoba, Canada

Kelly Weinersmith, Rice University, USA

Dietmar Weinert, Martin-Luther-University Halle-Wittenberg, Germany

Martha Weiss, Georgetown University, USA

Marc Weissburg, Georgia Institute of Technology, USA

Kenneth Welch, University of Toronto Scarborough, Canada

Mathias Wernet, Free University of Berlin, Germany

Alexander Werth, Hampden-Sydney College, USA

Philip Wertz, University of Iowa, USA

Robert Wessells, Wayne State University, USA

Mary Jane West-Eberhard, Smithsonian Tropical Research Institute, Costa Rica

Mark Westneat, University of Chicago, USA

Christopher Wheat, Stockholm University, Sweden

Craig White, Monash University, Australia

Nia Whiteley, Bangor University, United Kingdom

Dieter Wicher, Max Planck Institute for Chemical Ecology, Germany

Martin Wikelski, Max Planck Institute for Animal Behaviour, Germany

Michael Wilkie, Wilfrid Laurier University, Canada

Iain Wilkie, University of Glasgow, United Kingdom

Terrie Williams, University of California, Santa Cruz, USA

E. Williams, Salisbury University, USA



Tony Williams, Simon Fraser University, Canada

Susan Williams, Ohio University, USA

Cassandra Williams, National Marine Mammal Foundation, USA

Caroline Williams, University of California, Berkeley, USA

Jason Williams, Hofstra University, USA

Amanda Williard, University of North Carolina Wilmington, USA

Rod Wilson, University of Exeter, United Kingdom

Jonathan Wilson, Wilfrid Laurier University, Canada

Alan Wilson, Royal Veterinary College, United Kingdom

Bodo Wilts, University of Fribourg, Switzerland

Wolfgang Wiltschko, Goethe University, Germany

Roswitha Wiltschko, Goethe University, Germany

Svante Winberg, Uppsala University, Sweden

Ursula Windberger, Medical University of Vienna, Austria

Michael Winklhofer, University of Oldenburg Germany

York Winter, Humboldt University Berlin, Germany

Hugh Winwood-Smith, University of Queensland, Australia

Philip Withers, University of Western Australia, Australia

Ginger Withers, Whitman College, USA

Itsanun Wiwatanaratanabutr, King Mongkut's Institute of Technology Ladkrabang, Thailand

Michał Wojciechowski, Nicolaus Copernicus University, Poland

Harald Wolf, University of Ulm, Germany

Jonas Wolff, Macquarie University, Australia

Chris Wood, University of British Columbia, Canada

Hannah Wood, Smithsonian Institution, USA

Sarah Woodley, Duquesne University, USA

H. Arthur Woods, University of Montana, USA

Patricia Wright, University of Guelph, Canada

Geraldine Wright, University of Oxford, United Kingdom

Megan Wright, Arcadia University, USA

Amy Wu, Queen's University, Canada

Russell Wyeth, St Francis Xavier University, Canada  
Doug Wylie, University of Alberta, Canada  
Antoine Wystrach, CNRS / Université Paul Sabatier, France  
Sana Yaar, University of Manchester, United Kingdom  
Jayne Yack, Carleton University, Canada  
KayLene Yamada, Auburn University, USA  
Weijun Yang, Zhejiang University, China  
Mingyao Yang, Sichuan Agricultural University, China  
Yu Yang, Johns Hopkins University, USA  
Alex Yarger, Case Western Reserve University, USA  
Kenjiro Yazawa, Shinshu University, Japan  
Isaac Yeaton, Virginia Tech, USA  
Mark Yeoman, University of Brighton, United Kingdom  
Joanne Yew, University of Hawaii, USA  
Jesse Young, Northeast Ohio Medical University, USA  
Bruce Young, A.T. Still University-Health, USA  
Rebecca Young, University of Texas at Austin, USA  
Carola Yovanovich, University of São Paulo, Brazil  
Abdullahi Yusuf, University of Pretoria, South Africa  
Casey Zakroff, Woods Hole Oceanographic Institution, USA  
Stacy Zamudio, Hackensack University Medical Center, USA  
Peter Zani, University of Wisconsin - Stevens Point, USA  
Eduardo Zattara, Indiana University Bloomington, USA  
Jochen Zeil, The Australian National University, Australia  
Bettina Zeis, University of Münster, Germany  
Lucas Zena, São Paulo State University, Brazil  
Yu Zeng, University of California, Berkeley, USA  
Yangfan Zhang, University of British Columbia, Canada  
Yue Zhang, University of Tübingen, Germany  
Sinan Zhang, University of Saskatchewan, Canada  
Zhi-Jun Zhao, Wenzhou University, China

Kai Zhao, Monell Chemical Senses Center, USA

Chuan Zhou, Chinese Academy of Sciences, China

Barbara Zielinski, University of Windsor, Canada

S. N. Zill, Marshall University School of Medicine, USA

Cédric Zimmer, University of South Florida, USA

Juan Zuluaga, University of North Carolina Wilmington, USA
